# Supplementary material for: Genome wide copy number analyses of superficial esophageal squamous cell carcinoma with and without metastasis
Source: PubMed Central journal article supplement (PMC5354893; doi:10.18632/oncotarget.13847), 2016-12-10
Supplement: oncotarget-08-5069-s001.pdf [file oncotarget-08-5069-s001.pdf]

# Genome wide copy number analyses of superficial esophageal squamous cell carcinoma with and without metastasis

## SUPPLEMENTARY FIGURES AND TABLES

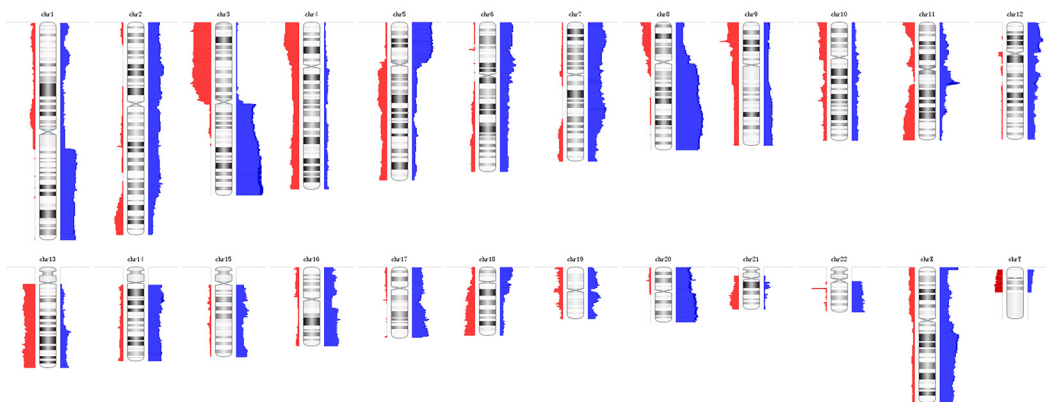

Supplementary Figure S1: Genome wide copy number alteration profiles of esophageal squamous cell carcinoma.

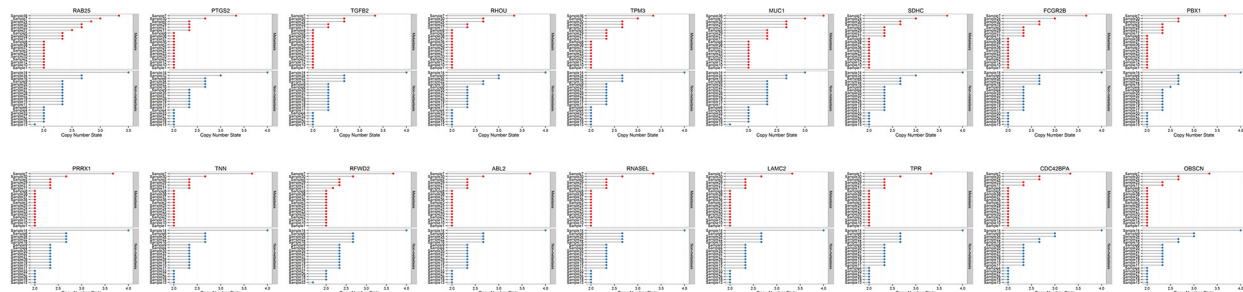

Supplementary Figure S2: Copy number of 38 significantly different cancer genes.

**Supplementary Table S1: Amplification and deletion in 38 superficial ESCC.**

See Supplementary File 1

**Supplementary Table S2: Amplification and deletion in superficial ESCC metastasis group**

| Aberration    | Cytoband | q value  | Residual q value | Wide peak boundaries     | Genes in wide peak                                                                             |
|---------------|----------|----------|------------------|--------------------------|------------------------------------------------------------------------------------------------|
| amplification | 11q13.3  | 6.07E-25 | 6.07E-25         | chr11:69505646-70229170  | hsa-mir-548k FGF3 FGF4<br>PPFIA1 FADD FGF19<br>ANO1 MIR548K                                    |
| amplification | 14q21.1  | 0.001262 | 0.001262         | chr14:37723237-38345848  | FOXA1 MIPOL1                                                                                   |
| amplification | 3q26.33  | 0.019159 | 0.019159         | chr3:181522021-181879655 | SOX2-OT                                                                                        |
| amplification | 8q24.21  | 0.0385   | 0.0385           | chr8:128756748-128785045 | MYC                                                                                            |
| deletion      | 22q11.23 | 1.41E-15 | 1.41E-15         | chr22:24314259-24408077  | GSTT1 GSTT2 GSTTP1<br>LOC391322 GSTTP2                                                         |
| deletion      | 9p21.3   | 2.56E-13 | 2.56E-13         | chr9:21864099-21995085   | CDKN2A C9orf53                                                                                 |
| deletion      | 4q31.3   | 0.056146 | 0.056146         | chr4:153421335-153701129 | DKFZP434I0714 TIGD4<br>TMEM154 MIR4453                                                         |
| deletion      | 3p12.1   | 0.22579  | 0.22579          | chr3:79816313-93597666   | EPHA3 GBE1 HTR1F<br>POU1F1 CGGBP1<br>CHMP2B ZNF654<br>CADM2 C3orf38 VGLL3<br>LOC440970 MIR4795 |

**Supplementary Table S3: Amplification and deletion in superficial ESCC non-metastasis group.**

See Supplementary File 2

**Supplementary Table S4: Copy numbers of CCNL1 gene and PIK3CB gene of real time PCR.**

See Supplementary File 3
